# Supplementary material for: Whole-genome profiling and shotgun sequencing delivers an anchored, gene-decorated, physical map assembly of bread wheat chromosome 6A
Source: PubMed Central journal article supplement (PMC4241024; doi:10.1111/tpj.12550), 2014-05-09

-  *Aegilops tauschii*
-  *Triticum urartu*
-  6A WCS contigs
-  WGP tags
-  6A clones

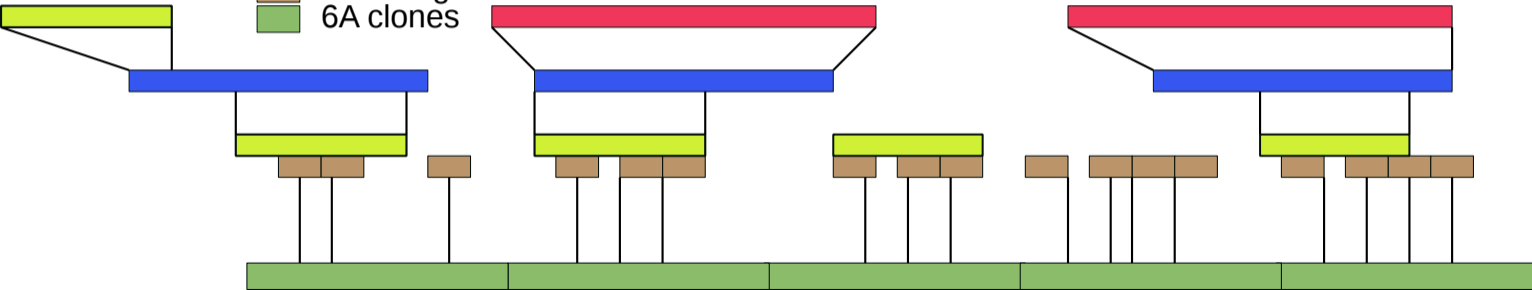

Supplement: tpj0079-0334-SD1.pdf [file tpj0079-0334-SD1.pdf]
